# Supplementary material for: Trifolirhizin induces autophagy-dependent apoptosis in colon cancer via AMPK/mTOR signaling
Source: PubMed Central journal article supplement (PMC7452898; doi:10.1038/s41392-020-00281-w), 2020-08-27
Supplement: 41392_2020_281_MOESM2_ESM.pdf [file 41392_2020_281_MOESM2_ESM.pdf]

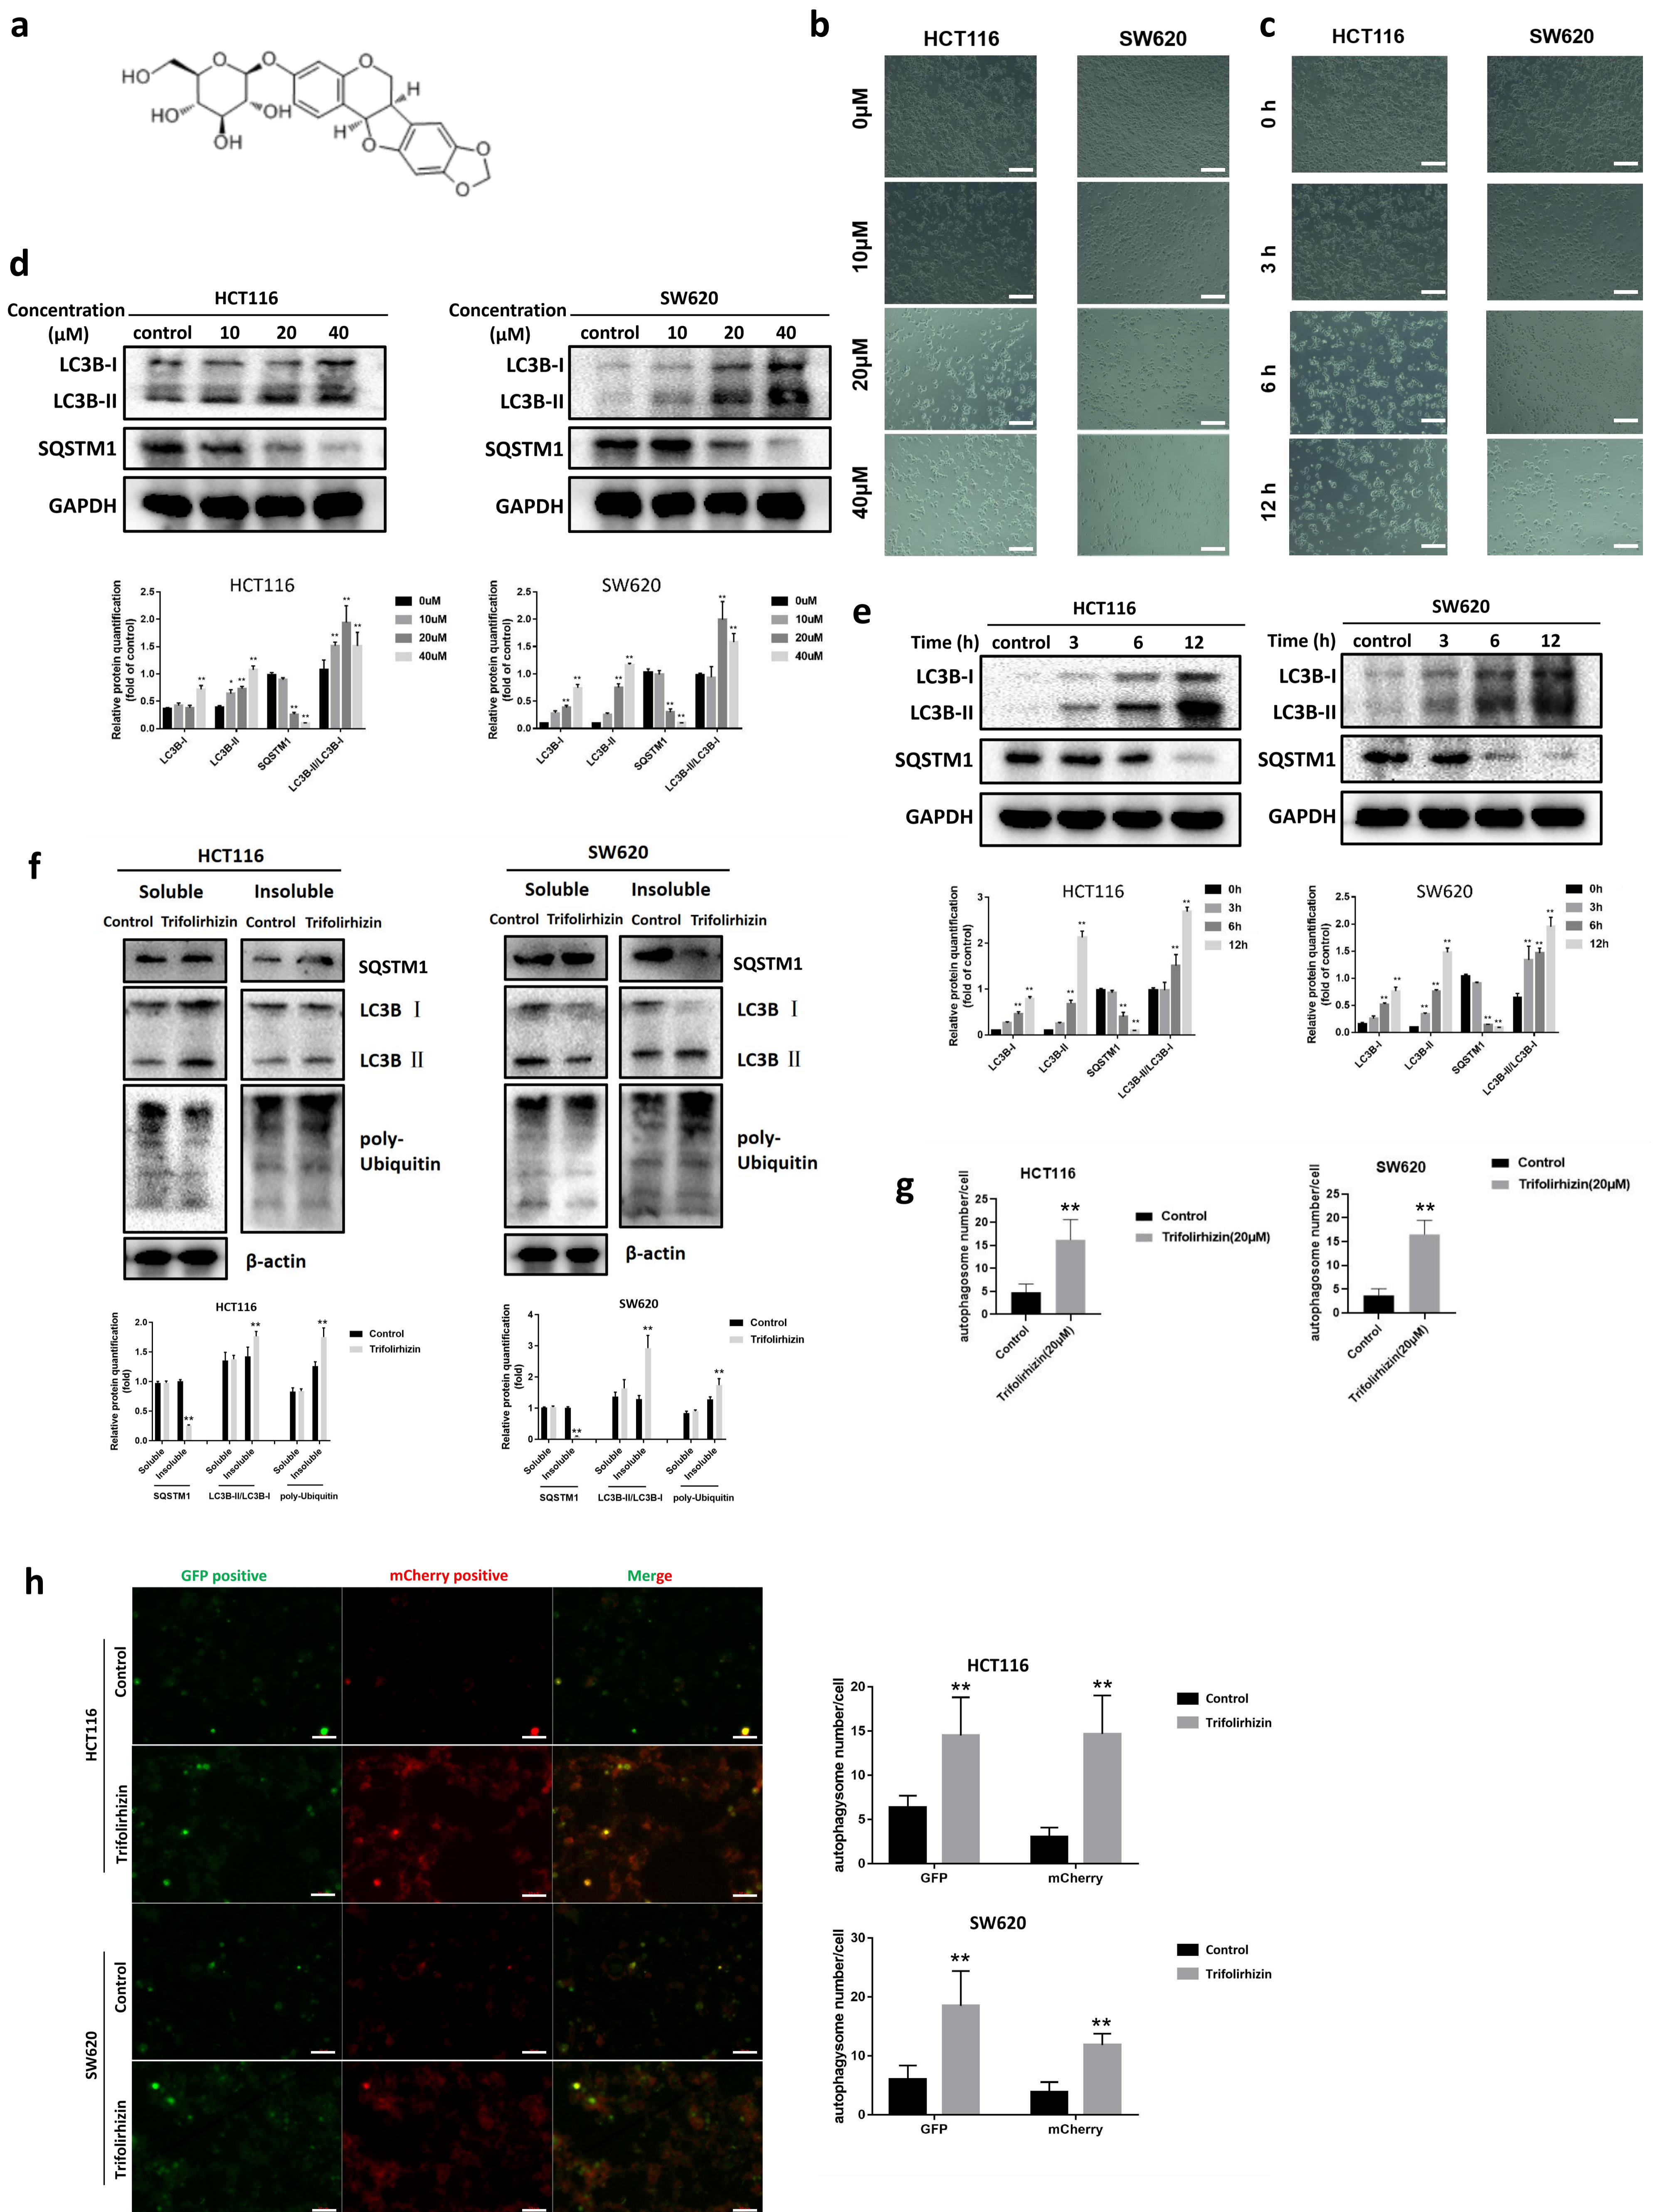

Figure S1

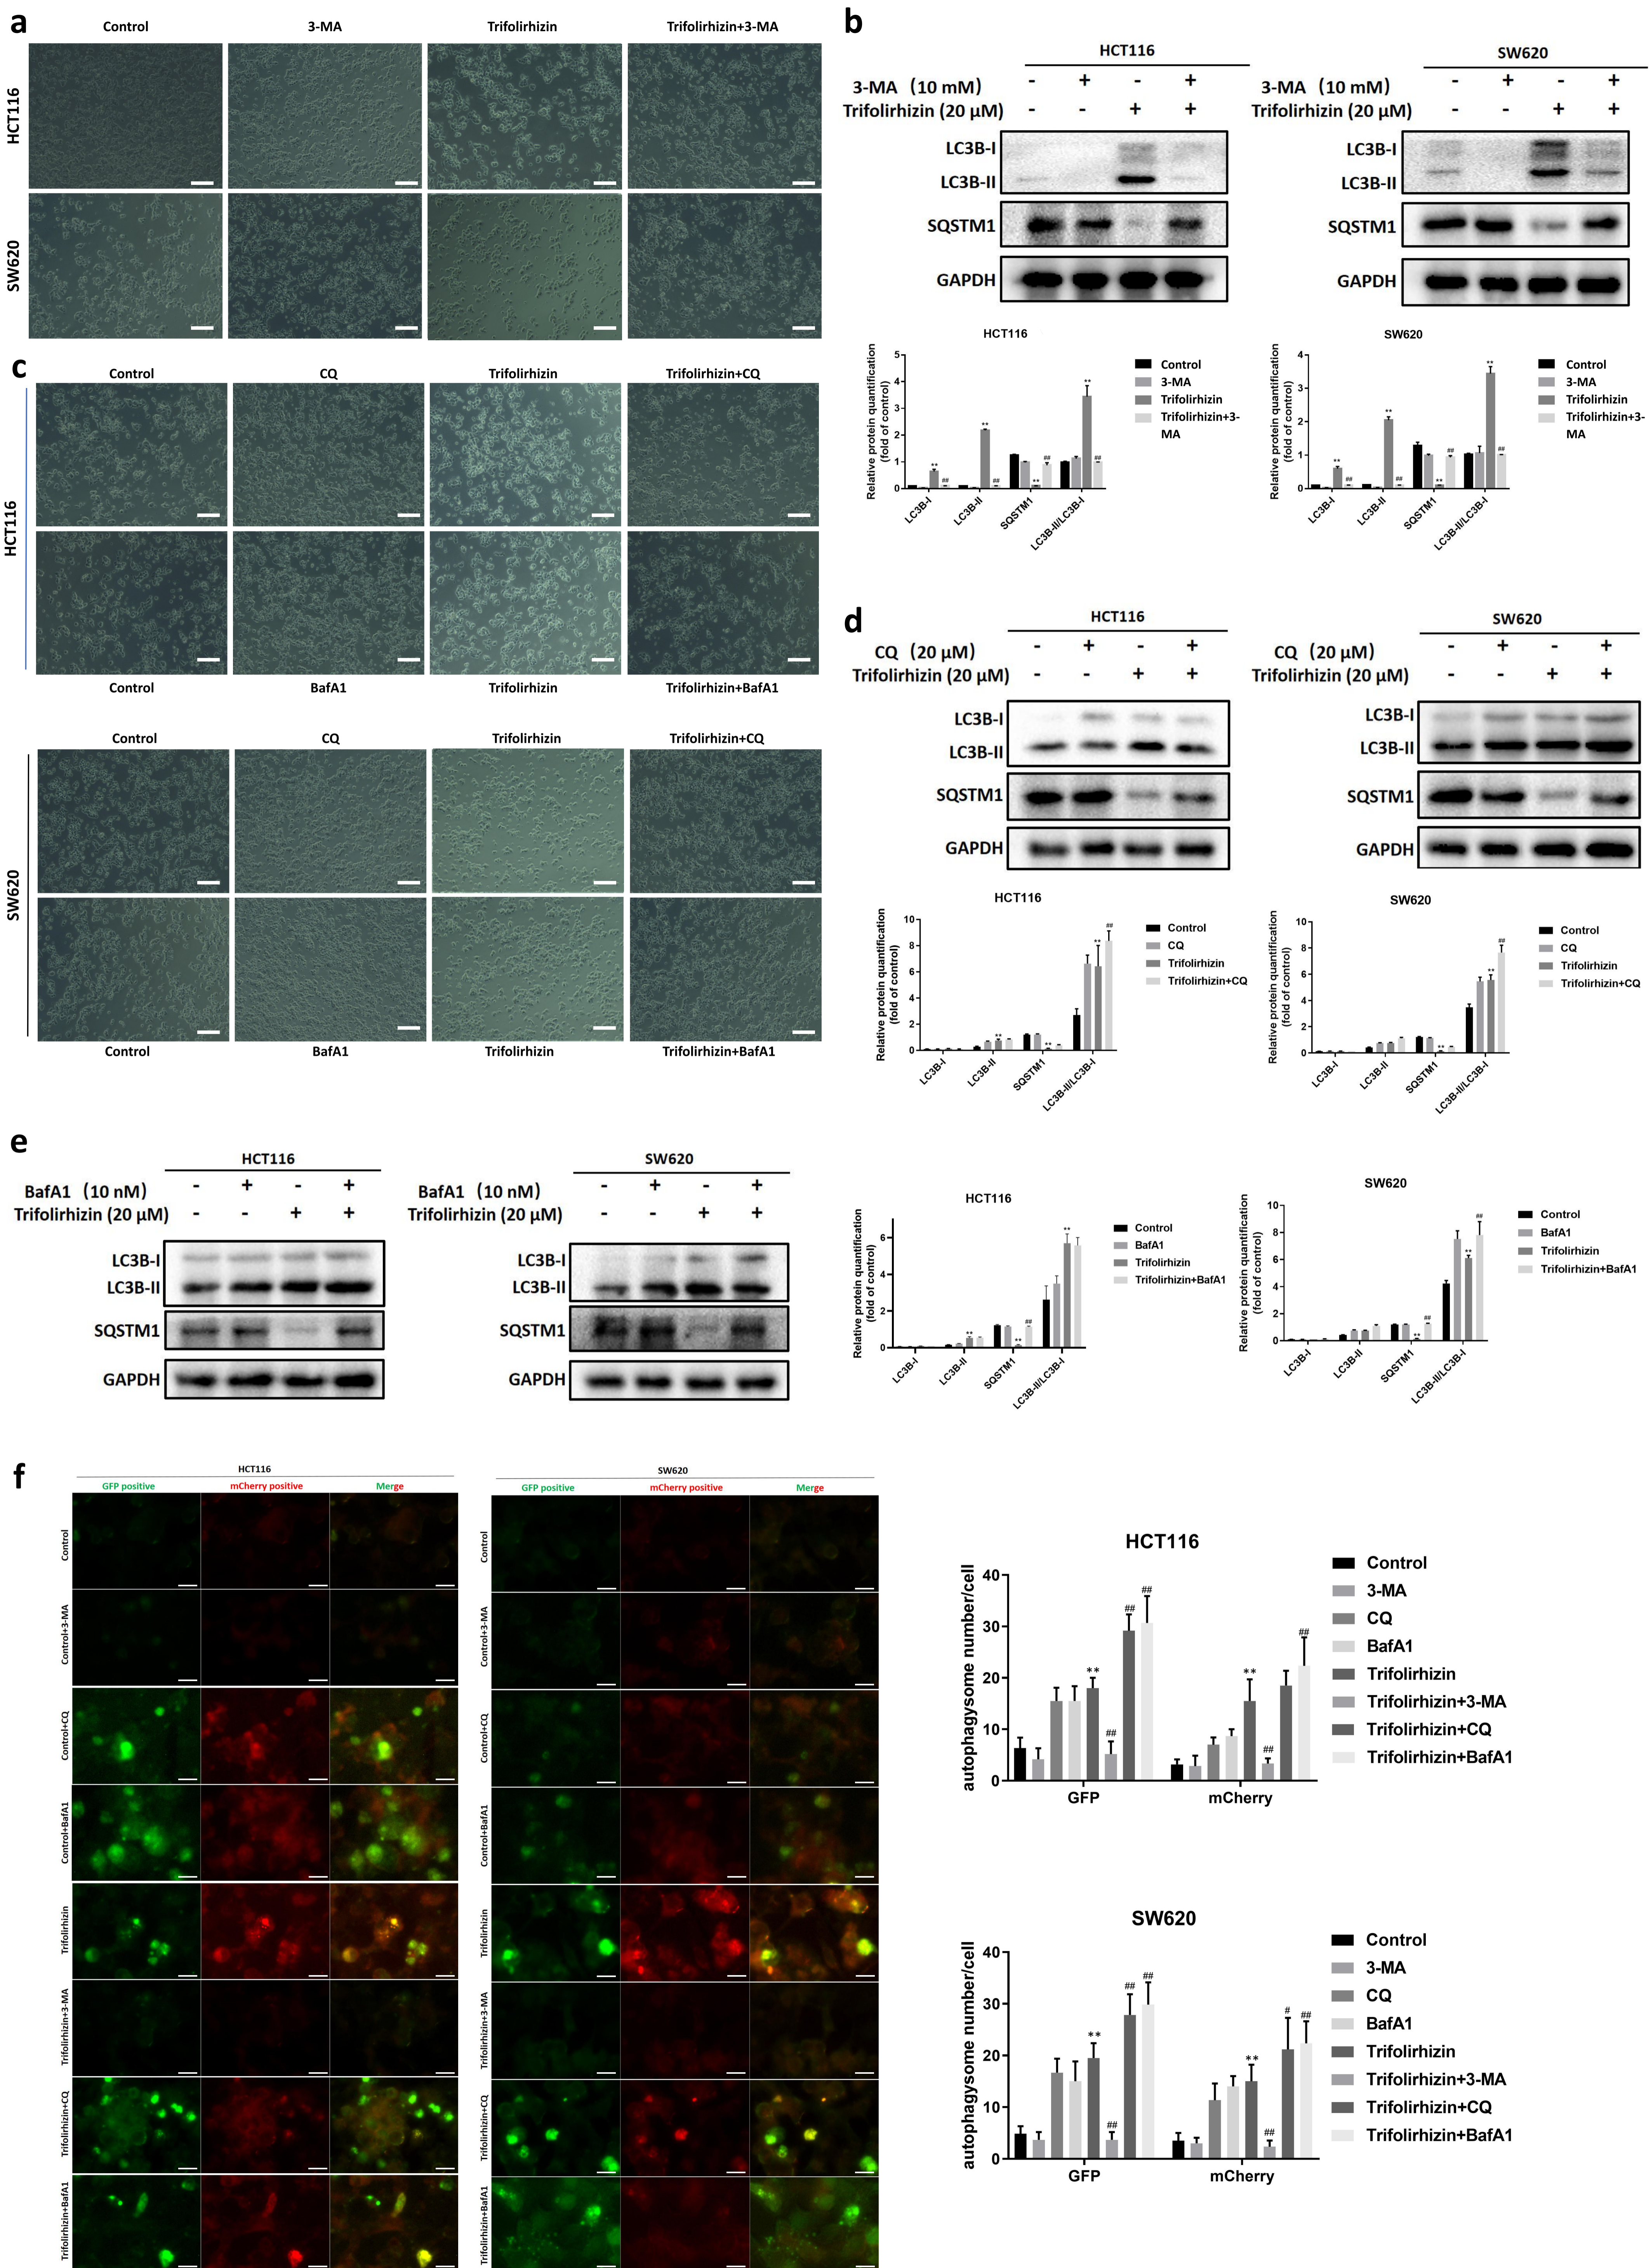

Figure S2

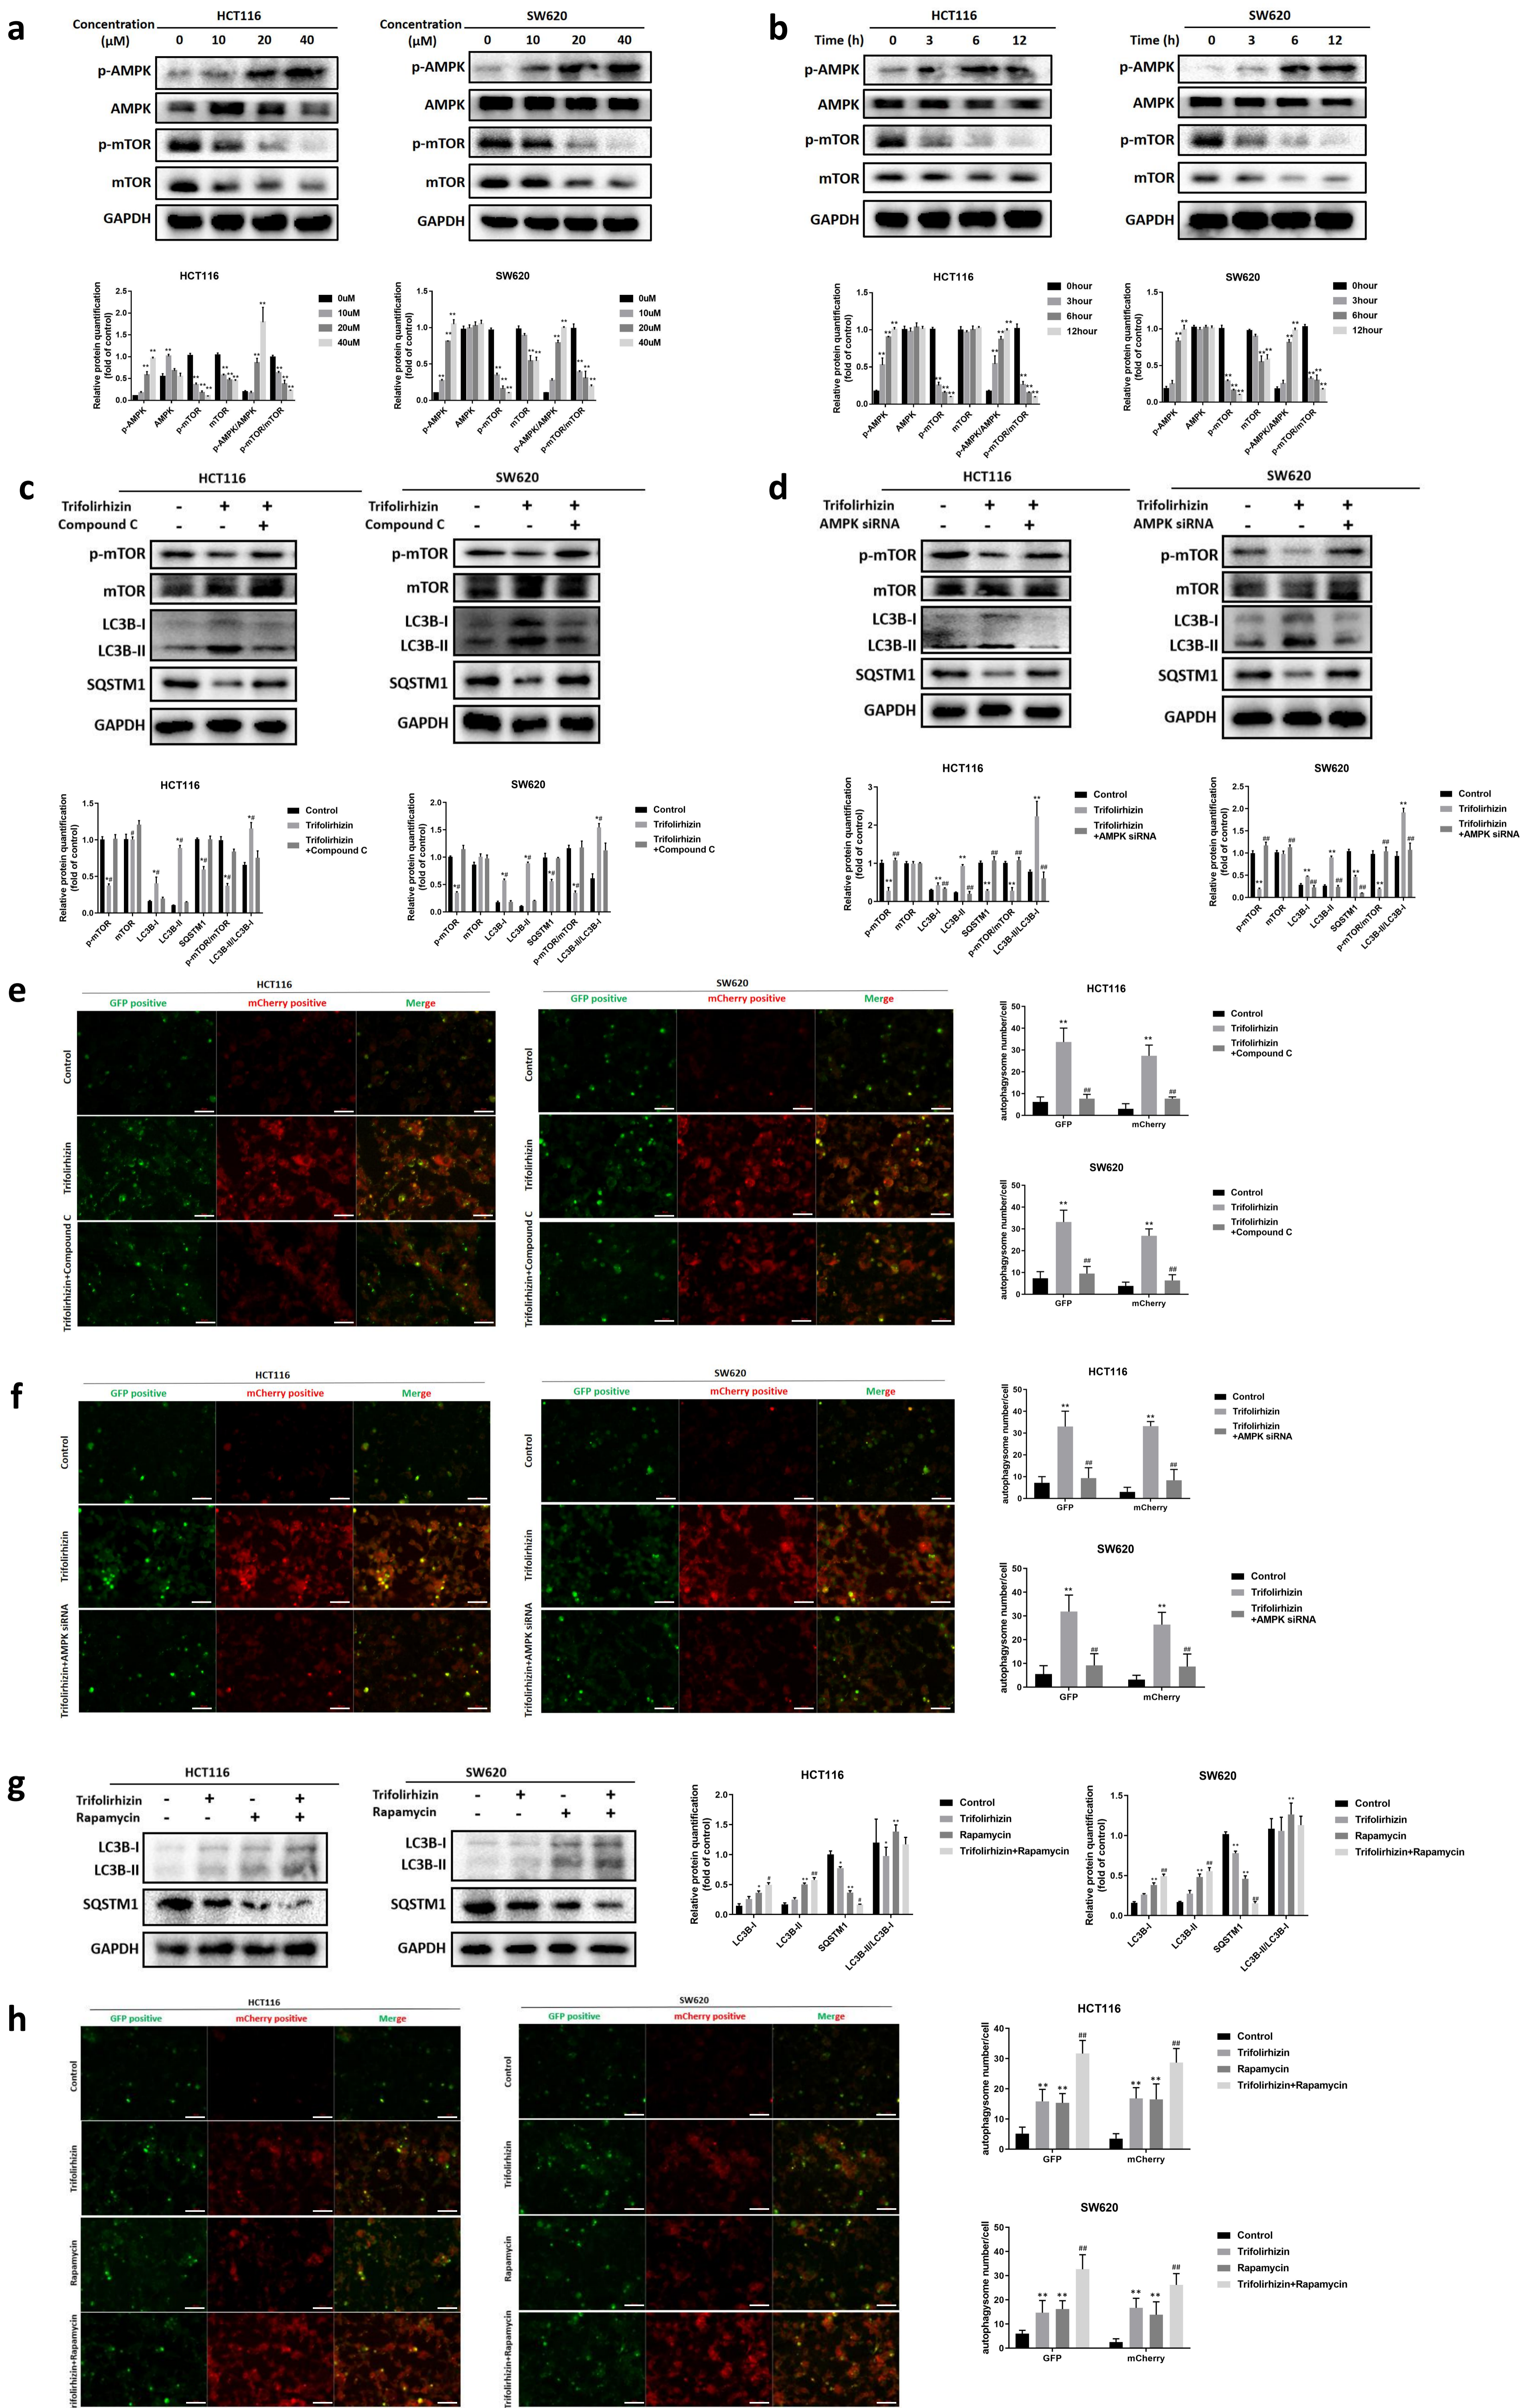

Figure 3



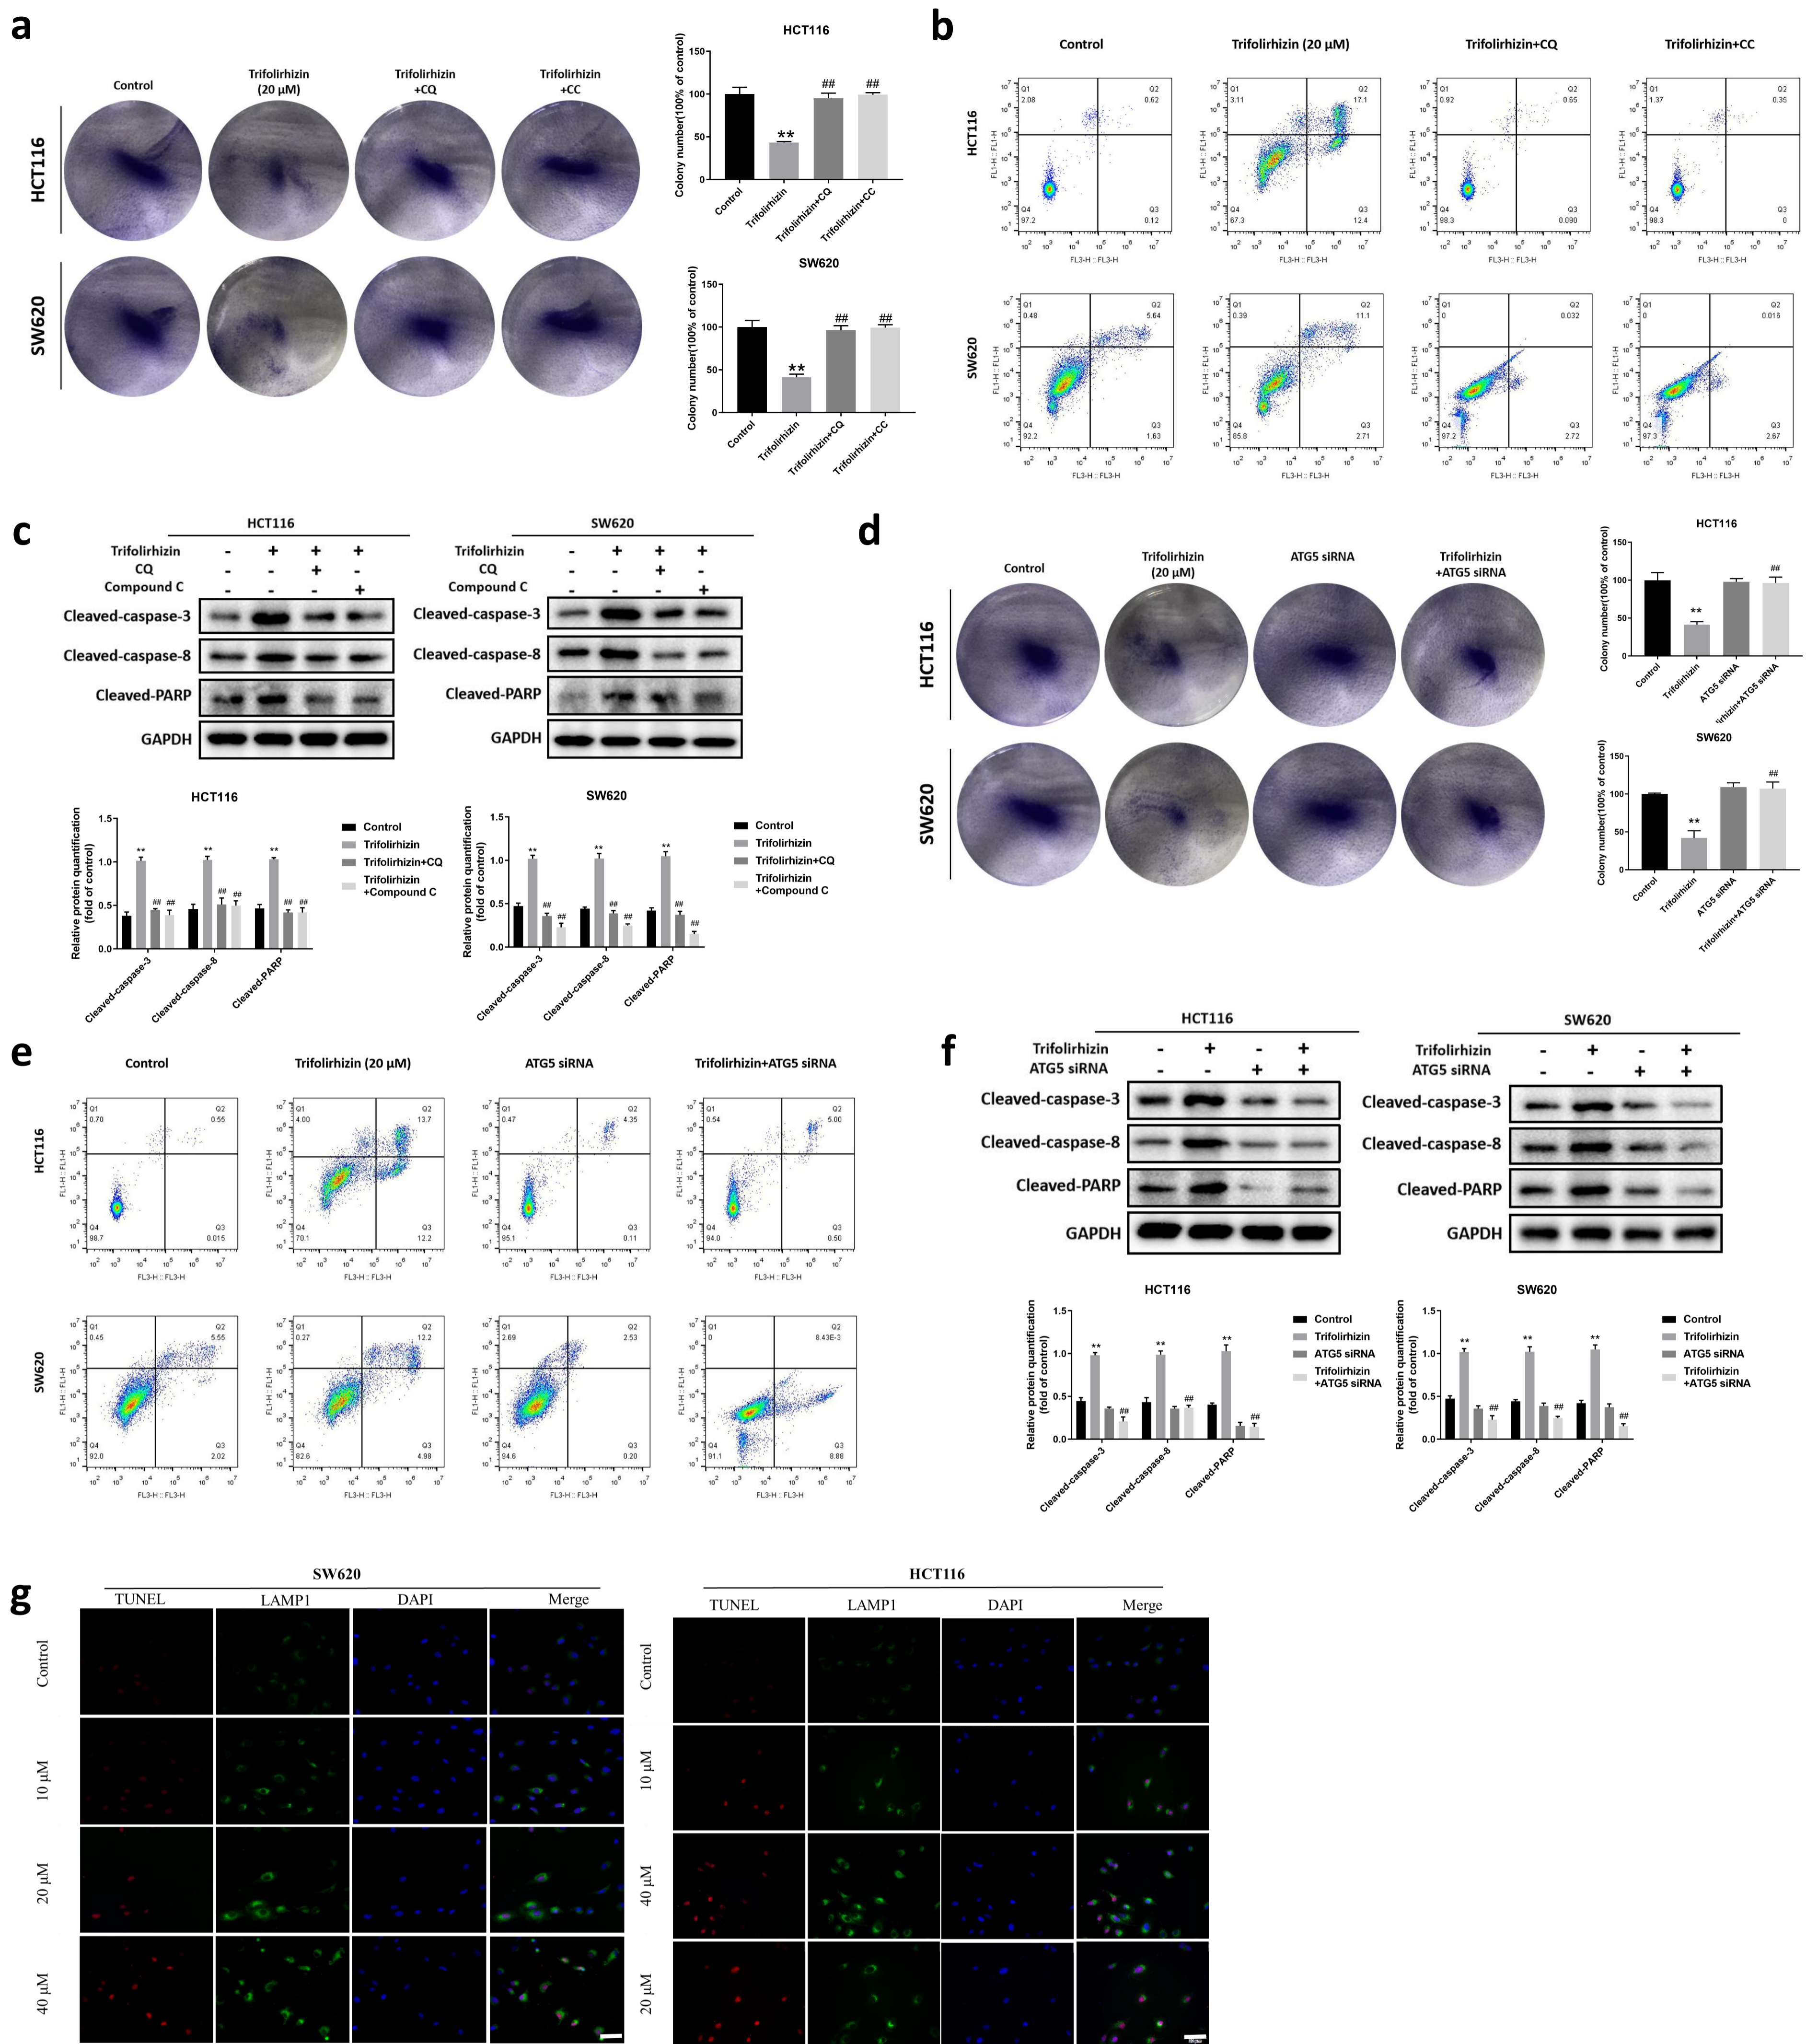

Figure S5

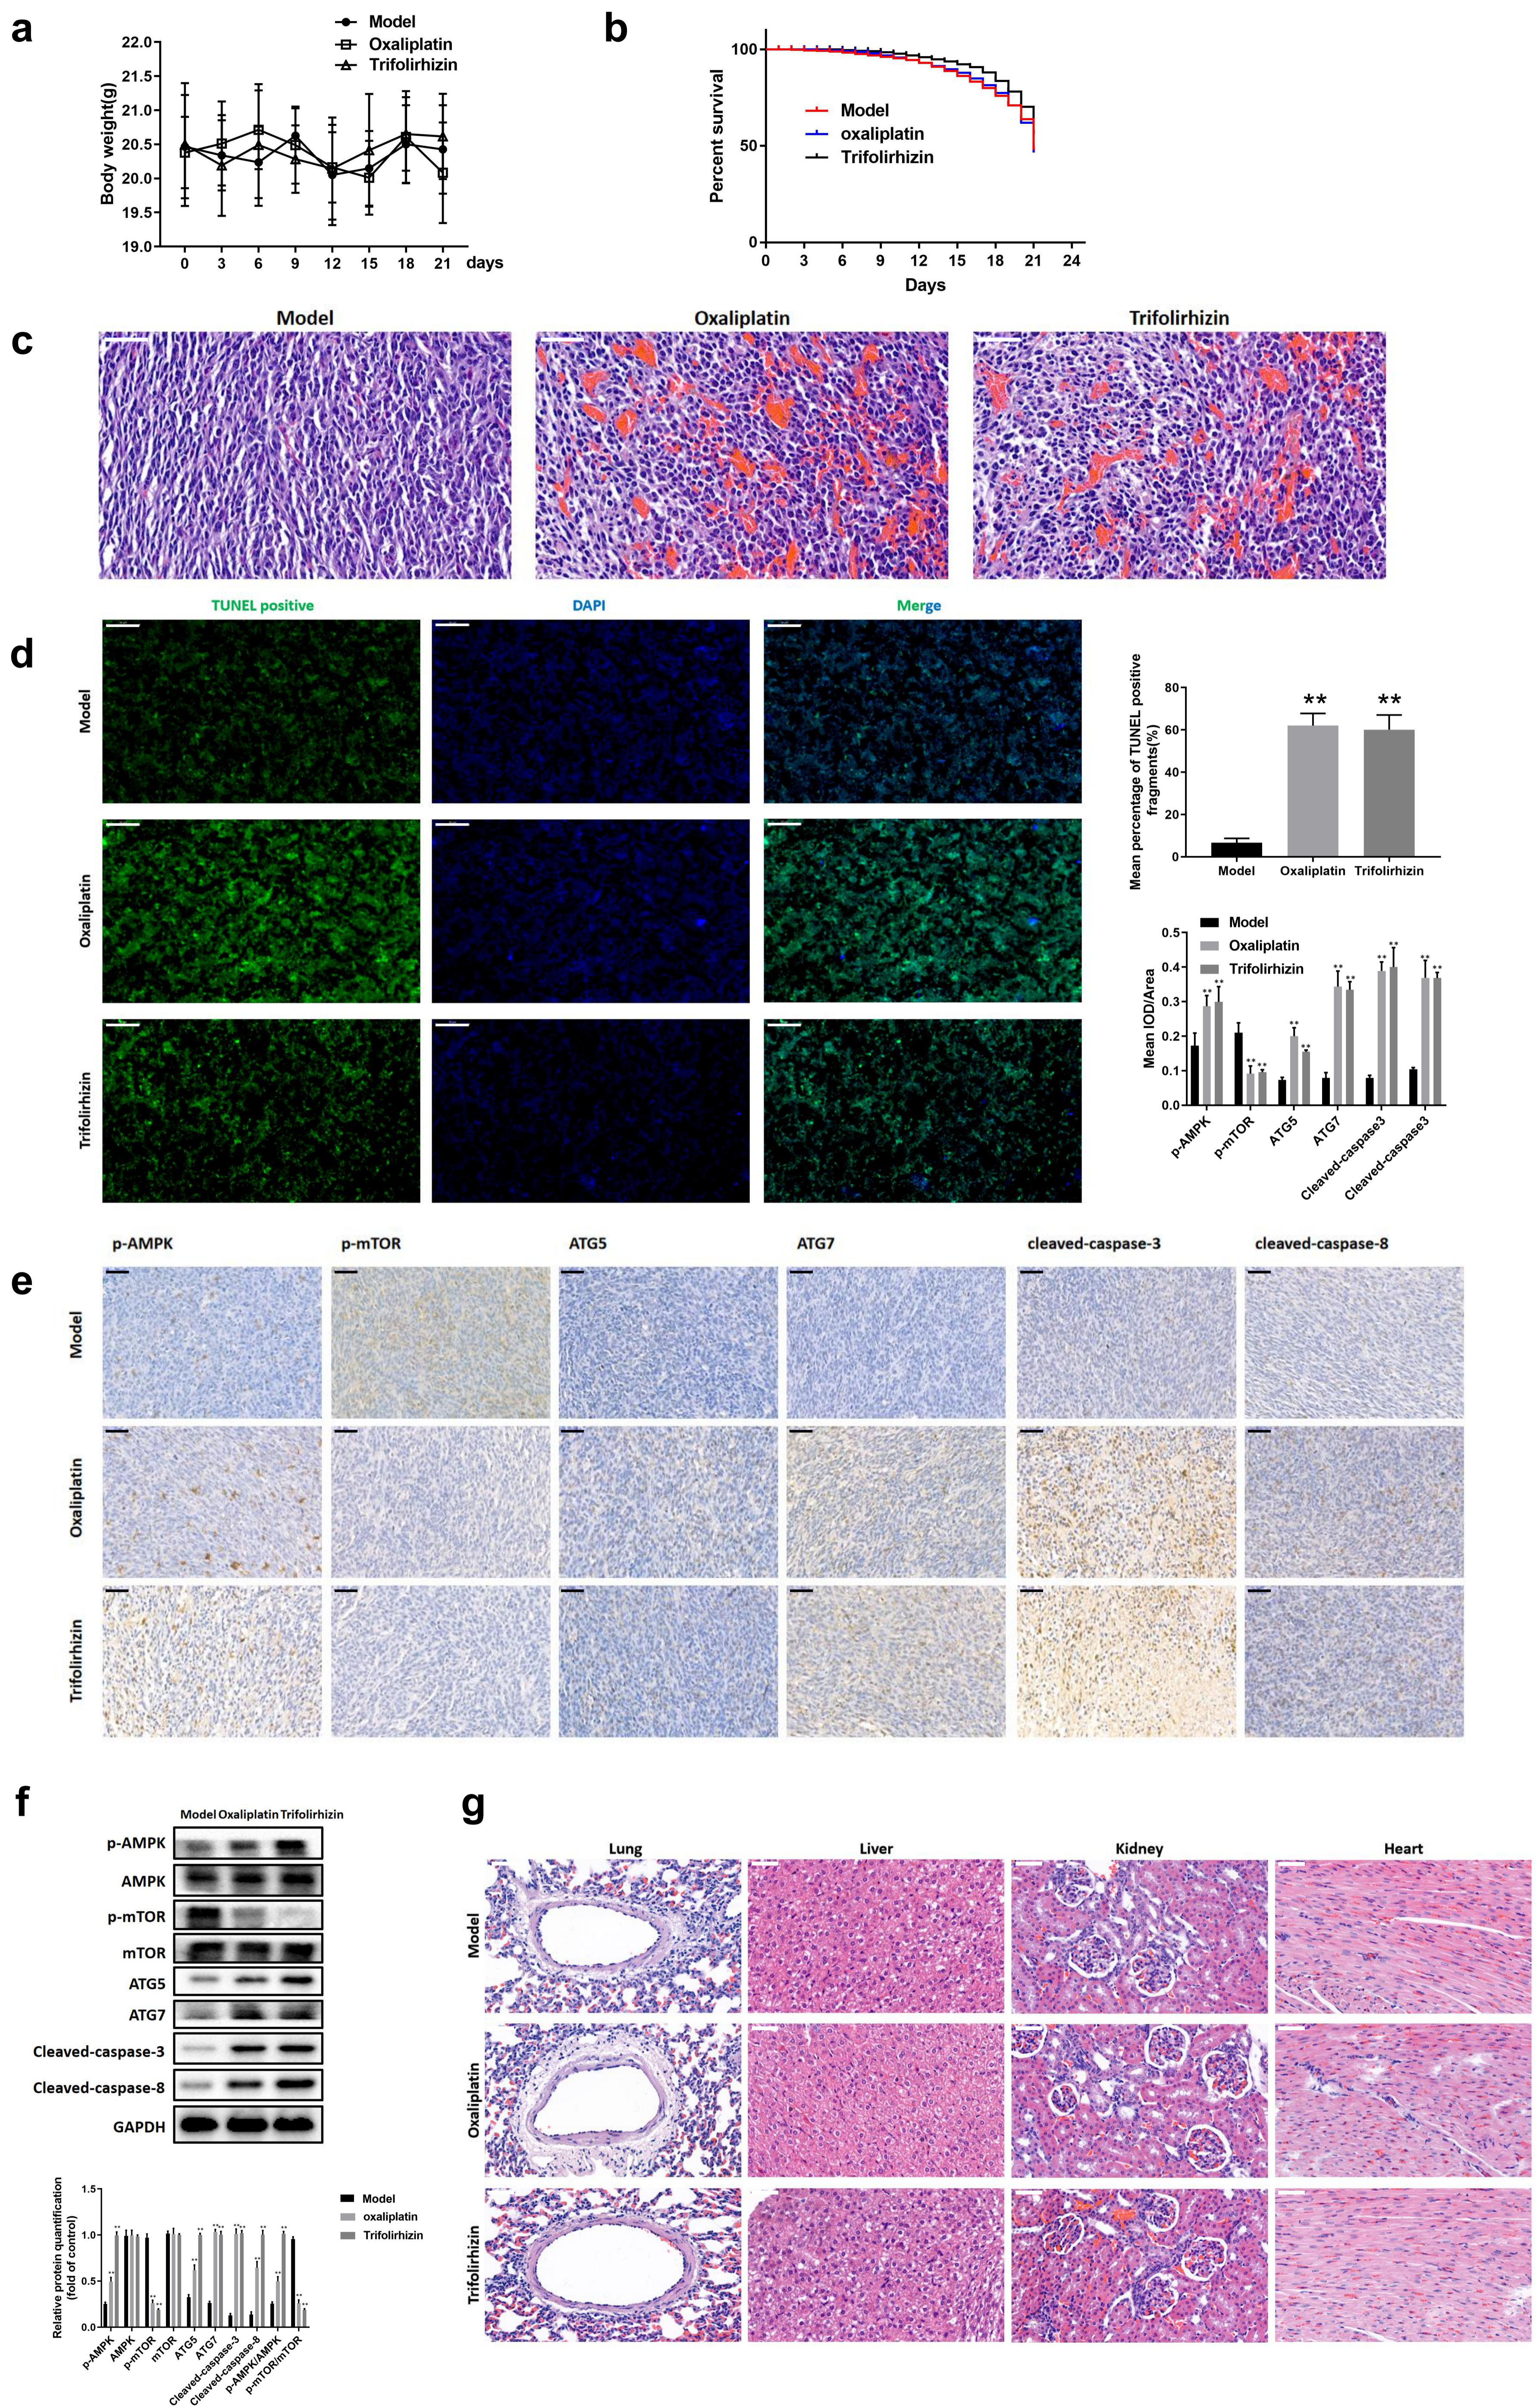

Figure S6
